# Supplementary material for: Predicting success of oligomerized pool engineering (OPEN) for zinc finger target site sequences
Source: Springer Nature journal article supplement (doi:10.1186/1471-2105-11-543), 2010-11-02
Supplement: Additional file 1 [file 1471-2105-11-543-s1.pdf]

**Table S1:** ZFTS135 dataset of zinc finger target sequences and activity labels. DNA sequences of zinc finger target sites (shown reading 5' - 3') and functional activity labels for 135 experimentally validated ZFP-target site pairs analyzed in this study. "Active" indicates sites for which the OPEN method has been used to generate at least one corresponding zinc finger array that provides  $\geq 3$ -fold activation of a  $\beta$ -galactosidase reporter gene in a bacterial 2-hybrid (B2H) reporter assay. For 82 target sites, B2H assay results are reported here for the first time. Asterisks (\*) denote the remaining 53 target sites for which B2H activity results were reported previously and were extracted from ZiFDB (<http://bindr.gdcb.iastate.edu/ZiFDB/>).

| Target 5' - 3' | Activity Label | Target 5' - 3' | Activity Label | Target 5' - 3' | Activity Label |
|----------------|----------------|----------------|----------------|----------------|----------------|
| GCATTTTTT      | Inactive       | GAGGGCGGC      | Active         | *GGAGGGGCT     | Active         |
| GCCGCAGCT      | Inactive       | GAGGGGGCG      | Active         | GGAGGTGAC      | Active         |
| GCTTGAGCT      | Inactive       | *GAGTGAGGA     | Active         | GGAGGTGGA      | Active         |
| *GGCGCTAC      | Inactive       | GAGTGAGTT      | Active         | *GGAGGTGGT     | Active         |
| *GGCGGAGAT     | Inactive       | *GAGTTTGCC     | Active         | GGCGCAAC       | Active         |
| *GGCGTTTGC     | Inactive       | GATGAAGAC      | Active         | *GGCGGCGGA     | Active         |
| GGGAATAC       | Inactive       | *GATGAAGCT     | Active         | GGCTGAGGC      | Active         |
| GGTGTCTTT      | Inactive       | GATGAGGCG      | Active         | GGCTGGGCT      | Active         |
| *GTGGCGGAT     | Inactive       | GATGCCAAC      | Active         | GGCTGGGTG      | Active         |
| GTGTTTGAA      | Inactive       | GATGCGGCA      | Active         | *GGGAAGAG      | Active         |
| GTTGATTTT      | Inactive       | GATGTAGCC      | Active         | GGGAAGAT       | Active         |
| GTTTTTGAG      | Inactive       | GATTGAGTT      | Active         | *GGGGACGTC     | Active         |
| TAAGTTGTT      | Inactive       | GCAGAAGCT      | Active         | *GGGGAGGAG     | Active         |
| TCTGCATTC      | Inactive       | *GCAGCAGAG     | Active         | GGGGTCGAC      | Active         |
| *TCTGGCGCT     | Inactive       | *GCAGCAGGA     | Active         | GGGGTGGGT      | Active         |
| *TCTGGTTTC     | Inactive       | *GCAGCGGGC     | Active         | GGTGAATTT      | Active         |
| TCTGTGTTT      | Inactive       | *GCAGGAGGT     | Active         | GGTGAGGCA      | Active         |
| TCTTGGGTA      | Inactive       | GCAGTGTGT      | Active         | GGTGCAGCA      | Active         |
| *TGCGGCTGT     | Inactive       | GCCGAAGAT      | Active         | GGTGCTGAC      | Active         |
| TGCTGAGAC      | Inactive       | *GCCGCCGCG     | Active         | GGTGGCGCT      | Active         |
| TGCTTTGTT      | Inactive       | GCCGCTGGA      | Active         | GGTGGGGTG      | Active         |
| TGGGTAGAA      | Inactive       | *GCCGCTGGG     | Active         | GTAGAGGAG      | Active         |
| TGGTTTGTA      | Inactive       | *GCCGGCGGC     | Active         | *GTAGATGGA     | Active         |
| TGTGTGTTT      | Inactive       | GCCGGTGCA      | Active         | GTAGCCTGT      | Active         |
| TTAGGAGGT      | Inactive       | *GCCGGTGGC     | Active         | GTAGCTGGA      | Active         |
| TTTGAGGAT      | Inactive       | *GCCGTCGCC     | Active         | GTCGACGCC      | Active         |
| TTTGCTGAA      | Inactive       | GCGGCCGCG      | Active         | *GTCGATGCC     | Active         |
| TTTGTGGTG      | Inactive       | *GCGGCGGAC     | Active         | *GTCGGGGTA     | Active         |
| TTTGTGTGT      | Inactive       | *GCGGCTGGG     | Active         | GTCTGAGGC      | Active         |
| *GAAGAAGCT     | Active         | GCGGGGGGC      | Active         | GTCTGGGCT      | Active         |
| *GAAGACGCT     | Active         | GCGGGTGTG      | Active         | *GTGGACGCG     | Active         |
| *GAAGATGGT     | Active         | GCGGTGGCG      | Active         | *GTGGCTGGT     | Active         |
| *GAAGCAGCA     | Active         | GCGTGGGCG      | Active         | *GTGTAGGGG     | Active         |
| *GAAGGATTC     | Active         | GCGTTGGCG      | Active         | TAAGCAGAA      | Active         |
| *GAAGTGGTC     | Active         | GCTGACTTT      | Active         | TAATTGGAG      | Active         |
| GAATTGGCG      | Active         | GCTGAGGCT      | Active         | TCTGCTGGC      | Active         |
| *GACGACGGC     | Active         | *GCTGATGCC     | Active         | TCTGGTGAG      | Active         |
| GACGCCGGA      | Active         | GCTGCAGAA      | Active         | *TGGGAGTCT     | Active         |
| *GACGCTGCT     | Active         | GCTGCCGTC      | Active         | TGGGATGTT      | Active         |
| GACTGAGAA      | Active         | *GCTGCTGCC     | Active         | *TGGGGTGCC     | Active         |
| GACTGGGCG      | Active         | GCTGCTGGT      | Active         | *TGGGTGGCA     | Active         |
| GACTGGGCT      | Active         | GCTGGAGGG      | Active         | *TTAGAAGTG     | Active         |

|            |        |
|------------|--------|
| *GAGGACGGC | Active |
| *GAGGACGTG | Active |
| *TGGGCTGCT | Active |

|            |        |
|------------|--------|
| GCAGCGGGA  | Active |
| *GGAGGAGGT | Active |
| GGAGGCGTG  | Active |

|            |        |
|------------|--------|
| *TTATGGGAG | Active |
| TTTGTTGGC  | Active |
| *GGTGCTGCC | Active |
