# Supplementary material for: Predicting success of oligomerized pool engineering (OPEN) for zinc finger target site sequences
Source: Springer Nature journal article supplement (doi:10.1186/1471-2105-11-543), 2010-11-02
Supplement: Additional file 2 [file 1471-2105-11-543-s2.pdf]

**Table S2:** ZFTS140 dataset of 140 experimentally validated zinc finger target site sequences, used as an independent (“blind”) test set in this study. Target 5' - 3' = DNA sequence of zinc finger target site; Activity Label = actual activity, determined experimentally; Prediction: activity predicted by ZiFOpT; Confidence Score = confidence in prediction, ranging from 0 (lowest) to 9 (highest); see Methods for additional details.

| Target 5' - 3' | Activity Label | Prediction | Confidence Score |
|----------------|----------------|------------|------------------|
| GGTGGAGCA      | Active         | Active     | 9                |
| GGTGTCAA       | Active         | Active     | 9                |
| GTAGAAGAG      | Active         | Active     | 9                |
| GTAGCAGTC      | Active         | Active     | 9                |
| GTAGCTGCG      | Active         | Active     | 9                |
| GTCGTTGCC      | Active         | Active     | 9                |
| GTCTGAGTA      | Active         | Active     | 9                |
| GTGGATGGT      | Active         | Active     | 9                |
| GTGGCAGGA      | Active         | Active     | 9                |
| GTGGCCGTG      | Active         | Active     | 9                |
| TAATTGGGG      | Active         | Active     | 9                |
| TCTGAGGAC      | Active         | Active     | 9                |
| TCTGGTGAC      | Active         | Inactive   | 9                |
| TGGGATGTG      | Active         | Active     | 9                |
| TGGGCAGTG      | Active         | Active     | 9                |
| TGGGGGGCA      | Active         | Active     | 9                |
| TGGGTGAC       | Active         | Inactive   | 9                |
| TGTGACGGC      | Active         | Active     | 9                |
| TGTGGGGGG      | Active         | Active     | 9                |
| TTAGGGGAC      | Active         | Active     | 9                |
| TGGGATGGA      | Active         | Active     | 9                |
| GACGGCAAC      | Active         | Active     | 9                |
| GTAGAGGGT      | Active         | Active     | 9                |
| GCCGGAGAC      | Active         | Active     | 9                |
| GCATGGGCA      | Active         | Active     | 9                |
| GGTGATGCT      | Active         | Active     | 9                |
| GCCGAAGAG      | Active         | Active     | 9                |
| GACGGCTGT      | Active         | Active     | 9                |
| GCTGCAGGT      | Active         | Active     | 9                |
| GAGGATGTA      | Active         | Active     | 9                |
| GCCGAAGTT      | Active         | Active     | 9                |
| GACGGAGCT      | Active         | Active     | 9                |
| GCTGATGGC      | Active         | Active     | 9                |
| GCGGTTGCA      | Active         | Active     | 9                |
| GACGGAGTC      | Active         | Active     | 9                |
| GCAGGTGGA      | Active         | Active     | 9                |
| GGGGAAGGT      | Active         | Active     | 9                |
| GCCGCAGTG      | Active         | Active     | 9                |
| GATGGTGAG      | Active         | Active     | 9                |
| GGTTGGGAG      | Active         | Active     | 9                |

|           |        |        |   |
|-----------|--------|--------|---|
| GCAGGCGCA | Active | Active | 9 |
| GAGGAGGGT | Active | Active | 9 |
| GGGGAAGGA | Active | Active | 9 |
| GAGGAGAAC | Active | Active | 9 |
| GGAGCCGGC | Active | Active | 9 |
| GCTGAGGGG | Active | Active | 9 |
| GCAGAAGTA | Active | Active | 9 |
| GAAGTAGCA | Active | Active | 9 |
| GCTGAAGCG | Active | Active | 9 |
| GATGATGGC | Active | Active | 9 |
| GAGGAAGCT | Active | Active | 9 |
| GTGGATGCA | Active | Active | 9 |
| GTGGCAGAA | Active | Active | 9 |
| TAAGAAGAG | Active | Active | 9 |
| GACGGAGGA | Active | Active | 9 |
| GATGAAGAA | Active | Active | 9 |
| GTAGCGGGT | Active | Active | 9 |
| GGTTAGGAT | Active | Active | 9 |
| GCGGCGGCC | Active | Active | 9 |
| GGTTGAGCG | Active | Active | 9 |
| GAGGAGGAG | Active | Active | 9 |
| GAGGCGTGT | Active | Active | 9 |
| GGAGGTGAG | Active | Active | 9 |
| GGAGGTGCC | Active | Active | 9 |
| GAAGAAGAG | Active | Active | 9 |
| GCGGCCGAA | Active | Active | 9 |
| GGAGAAGTA | Active | Active | 9 |
| GCTGAGGGC | Active | Active | 9 |
| GAGGACTGC | Active | Active | 9 |
| GGGGCTGCA | Active | Active | 9 |
| GAGGTAGTG | Active | Active | 9 |
| GAGGCGGAC | Active | Active | 9 |
| TGCGATGGA | Active | Active | 9 |
| GCTGGTGTC | Active | Active | 9 |
| TGGGCCGAC | Active | Active | 9 |
| GAGGCAGAA | Active | Active | 9 |
| GAAGCAGGC | Active | Active | 9 |
| GAGGATGGG | Active | Active | 9 |
| GCATGAGCT | Active | Active | 9 |
| GCTGGTGCC | Active | Active | 9 |
| GAGGCCTGT | Active | Active | 9 |
| GCTGCGGTG | Active | Active | 9 |
| GGAGGAGAT | Active | Active | 9 |
| GTGGTGGCT | Active | Active | 9 |
| GGATGAGCC | Active | Active | 9 |
| GCTGACTGC | Active | Active | 9 |
| GCGGGAGGG | Active | Active | 8 |
| GCGGTAGCT | Active | Active | 8 |

|            |          |        |   |
|------------|----------|--------|---|
| GCTGACGGT  | Active   | Active | 8 |
| GCTGAGGAA  | Active   | Active | 8 |
| GCTGCAGAA  | Active   | Active | 8 |
| GCTGGTGAA  | Active   | Active | 8 |
| GCTGTGCGAA | Active   | Active | 8 |
| GCTGTTGGG  | Active   | Active | 8 |
| GGAGACGGT  | Active   | Active | 8 |
| GGCGACGGC  | Active   | Active | 8 |
| GGCGAGGAA  | Active   | Active | 8 |
| GGCGCAGGG  | Active   | Active | 8 |
| GGGGCAGTG  | Active   | Active | 8 |
| GGGGCGGGT  | Active   | Active | 8 |
| GGGGCTGAG  | Active   | Active | 8 |
| GGGGGAGGG  | Active   | Active | 8 |
| GGTGAAGAG  | Active   | Active | 8 |
| GGTGCCGAG  | Active   | Active | 8 |
| GACTTTGGT  | Inactive | Active | 7 |
| GAGGCAGCA  | Active   | Active | 7 |
| GAGGCCGAG  | Active   | Active | 7 |
| GAGGCCGGC  | Active   | Active | 7 |
| GAGGGAGGA  | Active   | Active | 7 |
| GAGGTGGGT  | Active   | Active | 7 |
| GCAGCAGGG  | Active   | Active | 7 |
| GCAGGGGCG  | Active   | Active | 7 |
| GCAGGTGCT  | Active   | Active | 7 |
| GCCGCGGCC  | Active   | Active | 7 |
| GCGGCTGCC  | Active   | Active | 7 |
| GCGGCTGCG  | Active   | Active | 7 |
| GAAGGGTGC  | Active   | Active | 6 |
| GAAGGTGTT  | Active   | Active | 6 |
| GAAGTCTGC  | Active   | Active | 6 |
| GACGAAGGC  | Active   | Active | 6 |
| GACGACGAA  | Active   | Active | 6 |
| GAGGAGGTC  | Active   | Active | 6 |
| GTCGTGGCC  | Inactive | Active | 5 |
| GTAGGAGAG  | Inactive | Active | 5 |
| GTCGGCGTA  | Inactive | Active | 5 |
| GGTGCTGCG  | Inactive | Active | 5 |
| GAAGGGGCC  | Active   | Active | 5 |
| GCAGCCGCA  | Inactive | Active | 4 |
| GGAGTTGTT  | Inactive | Active | 4 |
| GTCTGAGCA  | Inactive | Active | 4 |
| GGTTTTGCA  | Inactive | Active | 4 |
| GGTGATGAA  | Inactive | Active | 3 |
| GTCGCAGTA  | Inactive | Active | 3 |
| GCTTAGGGT  | Inactive | Active | 3 |
| GCGTTTGAG  | Inactive | Active | 2 |
| GTCGCTGTC  | Inactive | Active | 1 |

|           |          |          |   |
|-----------|----------|----------|---|
| TCTGGAGAT | Inactive | Inactive | 1 |
| TGTGAATGT | Inactive | Inactive | 1 |
| GGCGGAGCA | Inactive | Active   | 1 |
| GGTTTTGAG | Inactive | Active   | 0 |
